# Supplementary material for: Cross-cultural adaptation of the Arabic version of the oral health values scale
Source: PubMed Central journal article supplement (PMC11407107; doi:10.2340/aos.v83.41092), 2024-08-26
Supplement: AOS-83-41092-s1.pdf [file AOS-83-41092-s1.pdf]

Supplementary material has been published as submitted. It has not been copyedited or typeset by Acta Odontologica Scandinavica.

| Original English OHVS                                                                                    | Arabic OHVS                                                                                                           |
|----------------------------------------------------------------------------------------------------------|-----------------------------------------------------------------------------------------------------------------------|
| 1. It is important to me to keep my natural teeth.                                                       | 1. الحفاظ على جميع أسناني الطبيعية يعتبر مهم بالنسبة لي                                                               |
| 2. It is okay for me to miss a day or two of flossing when I am busy                                     | 2. لا بأس من تفويت يوم أو يومين من تنظيف الأسنان بالخيط تنظيف الأسنان, إذا كنت مشغولاً                                |
| 3. My smile is an important part of my appearance.                                                       | 3. ابتسامتي جزء مهم من مظهري.                                                                                         |
| 4. Going to a dentist is not worth the cost to me.                                                       | 4. الذهاب إلى طبيب الأسنان لا يستحق قيمته المالية بالنسبة لي.                                                         |
| 5. Flossing my teeth every day is a high priority for me                                                 | 5. تنظيف أسناني بالخيط كل يوم يعتبر اولوية بالنسبة لي                                                                 |
| 6. I would rather get dentures than spend money to treat cavities or gum disease                         | 6. أفضل أن يكون لدي طاقم أسنان صناعي عن دفع تكاليف الإهتمام بأسناني الطبيعية.                                         |
| 7. I think it is important that my teeth and gums are a source of pride.                                 | 7. أعتقد أنه من المهم أن تكون أسناني ولثتي مصدر إعتزاز لي.                                                            |
| 8. If I have a toothache, I prefer to wait and see if it will go away on its own before seeing a dentist | 8. إذا كنت اعاني من ألم في الأسنان فمن الأفضل الانتظار ومعرفة ما إذا كان سيختفي من تلقاء نفسه قبل زيارة طبيب الاسنان. |
| 9. I would not mind if I had to have a false tooth or dentures.                                          | 9. لا يزعجني إذا كان يجب أن يكون لدي سن صناعية أو "جسر".                                                              |
| 10. I make sure I have dental floss available with me so I have it when I need it                        | 10. أتأكد ان خيط تنظيف الأسنان موجود دائماً معي ليكون متوفر عندما احتاجه.                                             |
| 11. Going to the dentist is only important if my teeth or gums are bothering me.                         | 11. أنا اعتقد ان زياره طبيب الاسنان مهمة فقط عندما تزعجني مشاكل الاسنان او اللثة                                      |
| 12. The condition of my teeth and gums is an important part of my overall health.                        | 12. حالة أسناني ولثتي جزء مهم من صحتي العامة.                                                                         |
